# Supplementary material for: Fire Behavior of Polyamide 12/Rubber Formulations Made by Laser Sintering
Source: MDPI journal article supplement (doi:10.3390/ma15051773), 2022-02-26
Supplement: s1 [file s1]

# Fire Behavior of Polyamide 12/Rubber Formulations Made by Laser Sintering

Marcos Batistella <sup>1,\*</sup>, Monica Francesca Pucci <sup>2</sup>, Arnaud Regazzi <sup>2</sup>, José-Marie Lopez-Cuesta <sup>1</sup>, Ouassila Kadri <sup>3</sup>, David Bordeaux <sup>3</sup> and Florence Ayme <sup>3</sup>

<sup>1</sup> Polymers Composites and Hybrids (PCH), IMT Mines Ales, 30319 Ales, France; jose-marie.lopez-cuesta@mines-ales.fr

<sup>2</sup> LMGC, IMT Mines Ales, University Montpellier, CNRS, 30319 Ales, France; monica.pucci@mines-ales.fr (M.F.P.); arnaud.regazzi@mines-ales.fr (A.R.)

<sup>3</sup> SDTech, 30100 Ales, France; ouassila.kadri@sd-tech.com (O.K.); david.bordeaux@sd-tech.com (D.B.); florence.ayme@sd-tech.com (F.A.)

\* Correspondence: marcos.batistella@mines-ales.fr

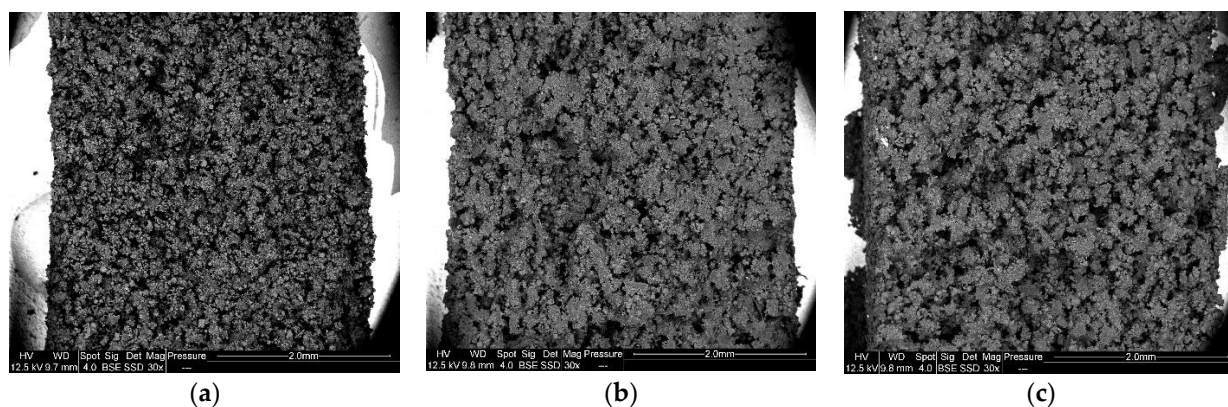

**Figure S1.** SEM images of LS printed parts at 30 x of samples containing 40 %wt. of carboxylated rubber using different laser power : (a) 3.5W, (b) 4W and (c) 4.5W.
